# Supplementary material for: In situ growth-etching synthesis of hierarchical SAPO-34 from recycled mother liquor for ethanol dehydration
Source: Royal Society of Chemistry journal article supplement (doi:10.1039/d4ce00142g), 2024-01-01
Supplement: d4ce00142g1.pdf [file d4ce00142g1.pdf]

Electronic Supplementary Information for

## **In situ growth-etching synthesis of hierarchical SAPO-34 from recycled mother liquor for ethanol dehydration**

**Shuhua Liu, Hongxia Zhang, Jianxia Zhang, Zhihao Bian, Fang Wang\*, Dezhi Han, Guangjian Wang, Liancheng Bing\***

*School of Chemical Engineering, Qingdao University of Science and Technology, Qingdao Shandong 266042, China  
E-mail: blc0633@126.com*

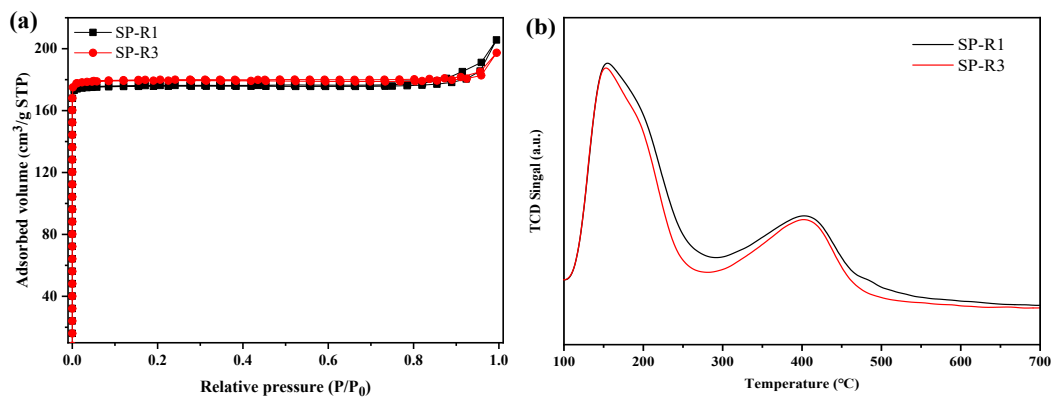

**Fig. S1** (a) N<sub>2</sub> adsorption/desorption isotherms (b) NH<sub>3</sub>-TPD profiles of SP-R1 and SP-R3.

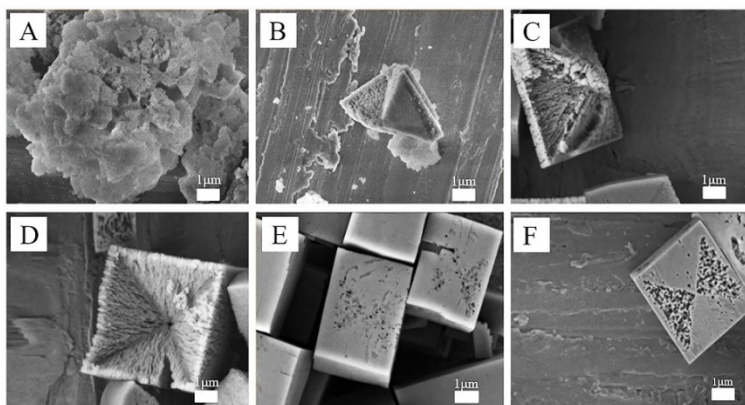

**Fig. S2** SEM images of SP-T9 synthesized at (A)1 h, (B) 2 h, (C) 3 h, (D) 6 h, (E) 18 h, and (F) 24 h.

**Table S1** Gel composition, pH of synthesis systems and mother liquid composition.

| Samples | Gel composition                                                                                                                                                                                                                                                                | Mother liquid composition <sup>[d]</sup>                                                                                            | pH   |
|---------|--------------------------------------------------------------------------------------------------------------------------------------------------------------------------------------------------------------------------------------------------------------------------------|-------------------------------------------------------------------------------------------------------------------------------------|------|
| SP-T3   | 1.00 Al <sub>2</sub> O <sub>3</sub> : 1.00 P <sub>2</sub> O <sub>5</sub> : 0.20 SiO <sub>2</sub> : 3.00 TEA: 50 H <sub>2</sub> O                                                                                                                                               | 0.63 Al <sub>2</sub> O <sub>3</sub> : 0.55 P <sub>2</sub> O <sub>5</sub> : 0.14 SiO <sub>2</sub> : 2.21 TEA:<br>35 H <sub>2</sub> O | 7.65 |
| SP-T9   | 1.00 Al <sub>2</sub> O <sub>3</sub> : 1.00 P <sub>2</sub> O <sub>5</sub> : 0.20 SiO <sub>2</sub> : 9.00 TEA: 50 H <sub>2</sub> O                                                                                                                                               | 0.64 Al <sub>2</sub> O <sub>3</sub> : 0.57 P <sub>2</sub> O <sub>5</sub> : 0.13 SiO <sub>2</sub> : 8.15 TEA:<br>36 H <sub>2</sub> O | 9.54 |
| SP-R1   | (0.64 <sup>[a]</sup> +0.36 <sup>[b]</sup> ) Al <sub>2</sub> O <sub>3</sub> : (0.57 <sup>[a]</sup> +0.43 <sup>[b]</sup> ) P <sub>2</sub> O <sub>5</sub> :<br>(0.13 <sup>[a]</sup> + 0.07 <sup>[b]</sup> ) SiO <sub>2</sub> : 8.15 TEA <sup>[c]</sup> : (36+14) H <sub>2</sub> O | 0.62 Al <sub>2</sub> O <sub>3</sub> : 0.56 P <sub>2</sub> O <sub>5</sub> : 0.14 SiO <sub>2</sub> : 7.34 TEA:<br>34 H <sub>2</sub> O | 8.83 |
| SP-R2   | (0.62 <sup>[a]</sup> +0.38 <sup>[b]</sup> ) Al <sub>2</sub> O <sub>3</sub> : (0.56 <sup>[a]</sup> +0.44 <sup>[b]</sup> ) P <sub>2</sub> O <sub>5</sub> :<br>(0.14 <sup>[a]</sup> + 0.06 <sup>[b]</sup> ) SiO <sub>2</sub> : 7.44 TEA <sup>[c]</sup> : (34+16) H <sub>2</sub> O | 0.65 Al <sub>2</sub> O <sub>3</sub> : 0.54 P <sub>2</sub> O <sub>5</sub> : 0.14 SiO <sub>2</sub> : 6.78 TEA:<br>36 H <sub>2</sub> O | 8.40 |
| SP-R3   | (0.65 <sup>[a]</sup> +0.36 <sup>[b]</sup> ) Al <sub>2</sub> O <sub>3</sub> : (0.54 <sup>[a]</sup> +0.43 <sup>[b]</sup> ) P <sub>2</sub> O <sub>5</sub> :<br>(0.14 <sup>[a]</sup> + 0.07 <sup>[b]</sup> ) SiO <sub>2</sub> : 6.82 TEA <sup>[c]</sup> : (36+14) H <sub>2</sub> O | 0.67 Al <sub>2</sub> O <sub>3</sub> : 0.60 P <sub>2</sub> O <sub>5</sub> : 0.15 SiO <sub>2</sub> : 6.26 TEA:<br>37 H <sub>2</sub> O | 8.12 |

[a] The residual inorganic sources in the mother liquids; [b] Supplemented inorganic sources; [c] The residual amount of TEA in the mother liquids according to TG analysis of the products; [d] Calculated by TG and ICP.

**Table S2** Physicochemical properties of SP-R1 and SP-R3.

| Samples | Si/Al <sup>[a]</sup>                                                   | S <sub>BET</sub> (m <sup>2</sup> /g) | S <sub>micro</sub> (m <sup>2</sup> /g) | S <sub>ext</sub> (m <sup>2</sup> /g) | V <sub>micro</sub> (cm <sup>3</sup> /g) | V <sub>meso</sub> (cm <sup>3</sup> /g) |
|---------|------------------------------------------------------------------------|--------------------------------------|----------------------------------------|--------------------------------------|-----------------------------------------|----------------------------------------|
| SP-R1   | Si <sub>0.07</sub> Al <sub>0.37</sub> P <sub>0.57</sub> O <sub>2</sub> | 537                                  | 532                                    | 4                                    | 0.270                                   | 0.048                                  |
| SP-R3   | Si <sub>0.06</sub> Al <sub>0.38</sub> P <sub>0.58</sub> O <sub>2</sub> | 548                                  | 545                                    | 5                                    | 0.276                                   | 0.029                                  |

[a] Measured by X-ray fluorescence (XRF) spectrometer.

**Table S3** Products distribution of ethanol conversion over SP-T3 and SP-T9 catalysts as a function of reaction temperature.

| Sample | Temperature<br>(°C) | Product content (%) |          |         |           |        |        |       |
|--------|---------------------|---------------------|----------|---------|-----------|--------|--------|-------|
|        |                     | Ethane              | Ethylene | Propane | Propylene | Butene | Butane | Ether |
| SP-T3  | 160                 | 3.1                 | 0        | 58.0    | 3.8       | 1.1    | 0      | 34.0  |
|        | 190                 | 4.0                 | 4.5      | 54.6    | 5.6       | 0.9    | 0      | 30.4  |
|        | 220                 | 5.3                 | 17.3     | 48.7    | 6.8       | 2.6    | 1.2    | 18.1  |
|        | 250                 | 2.6                 | 45.1     | 35.0    | 3.3       | 1.8    | 0.9    | 11.3  |
|        | 280                 | 0.9                 | 62.4     | 26.6    | 5.3       | 0.2    | 0      | 4.6   |
|        | 310                 | 1.3                 | 71.0     | 17.4    | 5.0       | 2.6    | 0.4    | 2.2   |
|        | 340                 | 2.2                 | 80.5     | 12.1    | 3.4       | 0.9    | 0      | 0.9   |
|        | 370                 | 0.9                 | 85.3     | 6.2     | 2.9       | 3.7    | 1.0    | 0     |
|        | 400                 | 0.5                 | 88.7     | 5.5     | 4.8       | 0.5    | 0      | 0     |
|        | SP-T9               | 160                 | 1.1      | 6.6     | 60.2      | 0      | 0      | 0     |
| 190    |                     | 5.7                 | 17.1     | 43.3    | 3.2       | 2.3    | 1.7    | 26.7  |
| 220    |                     | 3.7                 | 55.3     | 18.6    | 1.7       | 0.5    | 0.4    | 19.8  |
| 250    |                     | 2.2                 | 82.3     | 6.5     | 1.6       | 1.5    | 0.8    | 5.1   |
| 280    |                     | 0.3                 | 97.9     | 0.8     | 0.1       | 0      | 0      | 0.9   |
| 310    |                     | 0.2                 | 99.3     | 0.3     | 0.2       | 0      | 0      | 0     |
| 340    |                     | 0                   | 99.8     | 0.2     | 0         | 0      | 0      | 0     |
| 370    |                     | 0                   | 100      | 0       | 0         | 0      | 0      | 0     |
| 400    |                     | 0                   | 100      | 0       | 0         | 0      | 0      | 0     |

**Table S4** Products distribution of ethanol conversion over SP-R1, R2, and SP-R3 catalysts as a function of reaction temperature.

| Sample | Temperature<br>(°C) | Product content (%) |          |         |           |        |        |       |
|--------|---------------------|---------------------|----------|---------|-----------|--------|--------|-------|
|        |                     | Ethane              | Ethylene | Propane | Propylene | Butene | Butane | Ether |
| SP-R1  | 160                 | 2.9                 | 8.9      | 52.3    | 10.8      | 2      | 0      | 23.1  |
|        | 190                 | 3.6                 | 38.3     | 34.5    | 6.3       | 0      | 0      | 17.3  |
|        | 220                 | 0.5                 | 74.2     | 16.8    | 1.8       | 0.8    | 0      | 5.9   |
|        | 250                 | 1.3                 | 80.3     | 11.9    | 3.7       | 1.2    | 0.6    | 1     |
|        | 280                 | 0.1                 | 98.8     | 0.8     | 0.1       | 0      | 0      | 0.2   |
|        | 310                 | 0                   | 99.9     | 0.1     | 0         | 0      | 0      | 0     |
|        | 340                 | 0.1                 | 98.9     | 0.7     | 0.2       | 0.1    | 0      | 0     |
|        | 370                 | 0.1                 | 98.7     | 1       | 0.2       | 0      | 0      | 0     |
|        | 400                 | 0.1                 | 97.8     | 1.5     | 0.2       | 0.2    | 0.2    | 0     |
| SP-R2  | 160                 | 1.3                 | 2.3      | 68.5    | 1.1       | 0.1    | 0      | 26.7  |
|        | 190                 | 0.8                 | 26.6     | 46.3    | 7.7       | 0      | 0      | 18.6  |
|        | 220                 | 2.2                 | 56.3     | 22.2    | 6.2       | 1.3    | 0.1    | 11.7  |
|        | 250                 | 2.1                 | 74.5     | 14.2    | 2.1       | 0.3    | 0      | 6.8   |
|        | 280                 | 0.7                 | 92.5     | 3.3     | 1         | 0.3    | 0.1    | 2.1   |
|        | 310                 | 0.3                 | 97.8     | 1.2     | 0.5       | 0      | 0      | 0.2   |
|        | 340                 | 0.4                 | 98.7     | 0.8     | 0.1       | 0      | 0      | 0     |
|        | 370                 | 0.1                 | 99       | 0.5     | 0.4       | 0      | 0      | 0     |
|        | 400                 | 0.4                 | 98.4     | 1.1     | 0.1       | 0      | 0      | 0     |
| SP-R3  | 160                 | 3.7                 | 10.6     | 55.1    | 2.3       | 0.2    | 0      | 28.1  |
|        | 190                 | 2.8                 | 15.9     | 49.3    | 6.8       | 2.7    | 0.4    | 22.1  |
|        | 220                 | 3.1                 | 49.3     | 28.1    | 3.5       | 2.1    | 0.2    | 13.7  |
|        | 250                 | 0.6                 | 73.7     | 12.8    | 4.9       | 0.6    | 0.7    | 6.7   |
|        | 280                 | 0.6                 | 87.5     | 7.6     | 1.9       | 0.2    | 0      | 2.2   |
|        | 310                 | 0                   | 92.1     | 4.7     | 1.6       | 0.1    | 0      | 1.5   |
|        | 340                 | 0.2                 | 95.1     | 4.1     | 0.3       | 0      | 0      | 0.3   |
|        | 370                 | 0.1                 | 95.1     | 4.1     | 0.7       | 0      | 0      | 0     |
|        | 400                 | 1.5                 | 95.1     | 2.5     | 0.4       | 0.3    | 0.2    | 0     |
